# Supplementary material
Source: Springer Nature journal article supplement (https://www.springermedizin.de/resource/supplementary/12943_2013_1524_MOESM5_ESM.pdf/9552454)

**A**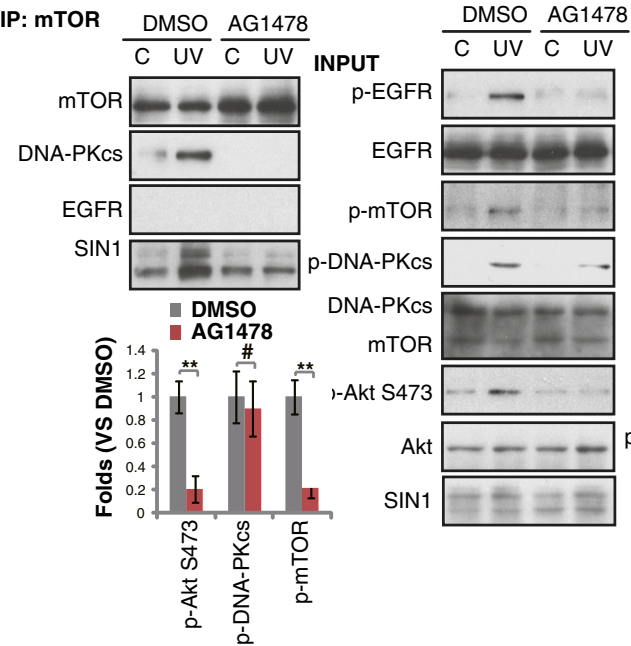**B**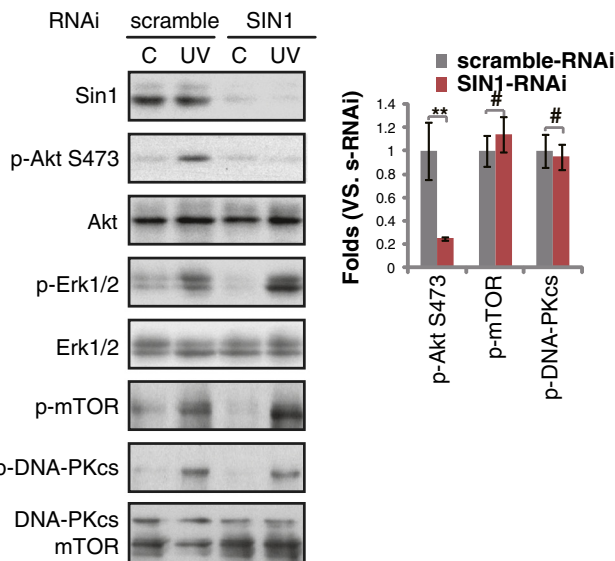**C**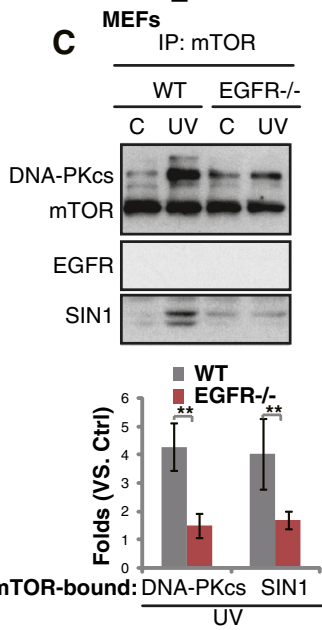**D**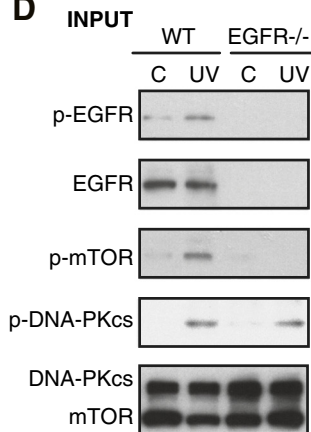**E**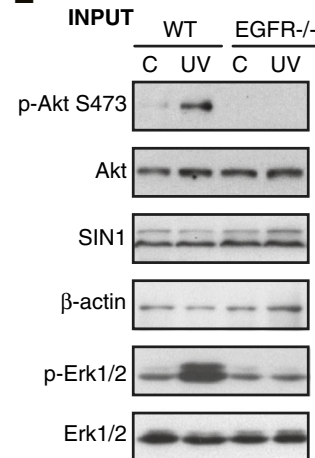

Supplement: MOESM5 [file 9552454]
